# Supplementary material for: Zero-carbon emission molecular energy technology and experiments
Source: Research Square preprint supplement (doi:10.21203/rs.3.rs-5572385/v1), 2025-03-21
Supplement: Supplementary file 2 [file 9392c7d9c00c66f06ea5ced0.pdf]

## Author contributions

Demin Huang: The project organizer and leader. Proposer of Zero-Carbon emission molecular energy technology. Nanoscale one-way valve concept and principle, proposer. The technical principle and method of reverse osmosis without energy consumption ,spontaneous water lifting , direct use of heat energy of water does work without temperature difference, proposer .Charge-type electrostatic field method of water level difference and water lifting experiment and experiments designer, experimenter .Paper writer.

Qizhao Luo: The first user of the experimental apparatus, the operator of power-source based electrostatic field water level difference experiment. The proofreader of the paper. Main contributor to the submission.

Weigang Li: The proposer and explorer of the early concepts, principles and methods, the designer. Experimenter of the power-source based electrostatic field water level difference experiment. The proofreader of the paper.

Bin Wu: The experiment leader and operator.

Yu Cheng: Paper translator, assistant contributor.

Rui Zhang: Project participant, proofreader.

Jie Wu: Project participant.

Zhuangfei Wu : Experimental Operator.

Zhuochao Ren : Experimental Operator.

There is no conflict of interest in this manuscript!
